# Supplementary material for: An ImmunoSignature test distinguishes Trypanosoma cruzi, hepatitis B, hepatitis C and West Nile virus seropositivity among asymptomatic blood donors
Source: PubMed Central journal article supplement (PMC5600393; doi:10.1371/journal.pntd.0005882), 2017-09-05

**Index test: IST fixed classifier**

**Reference test: CTS algorithm  
(3x EIA, RIPA)**

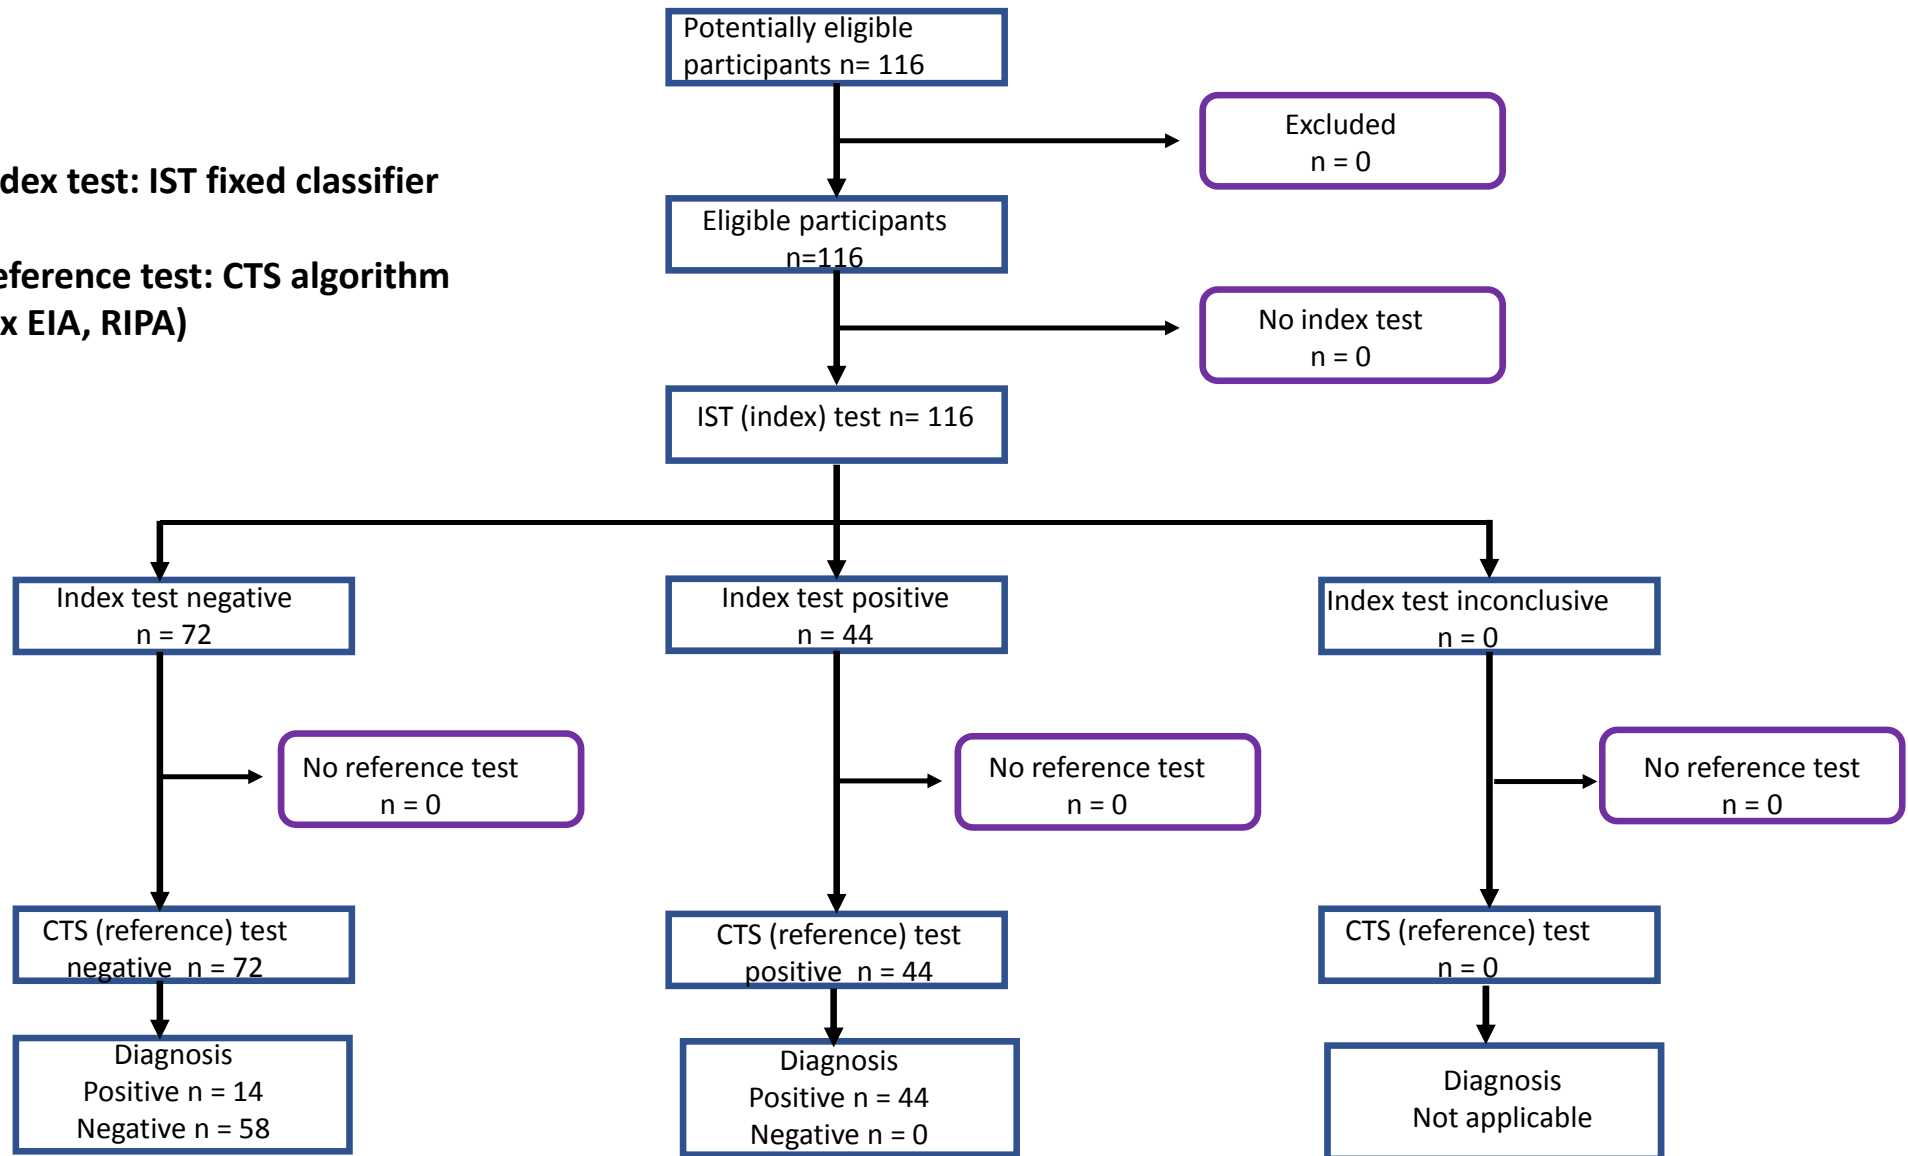

Supplement: pntd.0005882.s002.pdf [file pntd.0005882.s002.pdf]
