# Supplementary material for: An ImmunoSignature test distinguishes Trypanosoma cruzi, hepatitis B, hepatitis C and West Nile virus seropositivity among asymptomatic blood donors
Source: PubMed Central journal article supplement (PMC5600393; doi:10.1371/journal.pntd.0005882), 2017-09-05
Supplement: pntd.0005882.s007.pdf [file pntd.0005882.s007.pdf]

**S1 Table. Description of donors in the Chagas only study.**

|            | Training cohort (2015) |                        |                        |         |  | Test cohort (2016) |                        |                        |         |
|------------|------------------------|------------------------|------------------------|---------|--|--------------------|------------------------|------------------------|---------|
|            | all                    | <i>T. cruzi</i><br>neg | <i>T. cruzi</i><br>pos | S/CO >4 |  | all                | <i>T. cruzi</i><br>neg | <i>T. cruzi</i><br>pos | S/CO >4 |
| Group size | 335                    | 189                    | 146                    | 49      |  | 116                | 58                     | 58                     | 31      |
| Gender     |                        |                        |                        |         |  |                    |                        |                        |         |
| female     | 90                     | 80                     | 10                     | 2       |  | 48                 | 24                     | 24                     | 11      |
| male       | 127                    | 109                    | 18                     | 6       |  | 68                 | 34                     | 34                     | 20      |
| unknown    | 118                    | 0                      | 118                    | 41      |  | 0                  | 0                      | 0                      | 0       |
| Ethnicity  |                        |                        |                        |         |  |                    |                        |                        |         |
| white      | 145                    | 144                    | 1                      | 1       |  | 14                 | 8                      | 6                      | 4       |
| Hispanic   | 49                     | 32                     | 17                     | 4       |  | 84                 | 43                     | 41                     | 24      |
| black      | 4                      | 4                      | 0                      | 0       |  | 3                  | 2                      | 1                      | 0       |
| other      | 10                     | 9                      | 1                      | 0       |  | 2                  | 2                      | 0                      | 0       |
| unknown    | 127                    | 0                      | 127                    | 44      |  | 13                 | 3                      | 10                     | 3       |
| Age bin    |                        |                        |                        |         |  |                    |                        |                        |         |
| (15-20)    | 10                     | 9                      | 1                      | 1       |  | 16                 | 7                      | 9                      | 5       |
| (20-30)    | 29                     | 26                     | 3                      | 0       |  | 20                 | 11                     | 9                      | 5       |
| (30-40)    | 52                     | 46                     | 6                      | 1       |  | 24                 | 14                     | 10                     | 6       |
| (40-50)    | 38                     | 33                     | 5                      | 2       |  | 26                 | 9                      | 17                     | 7       |
| (50-60)    | 38                     | 32                     | 6                      | 1       |  | 21                 | 11                     | 10                     | 7       |
| (60-70)    | 29                     | 26                     | 3                      | 2       |  | 7                  | 4                      | 3                      | 1       |
| (70-87)    | 21                     | 17                     | 4                      | 1       |  | 2                  | 2                      | 0                      | 0       |
| unknown    | 118                    | 0                      | 118                    | 41      |  | 0                  | 0                      | 0                      | 0       |
