# Supplementary material for: An ImmunoSignature test distinguishes Trypanosoma cruzi, hepatitis B, hepatitis C and West Nile virus seropositivity among asymptomatic blood donors
Source: PubMed Central journal article supplement (PMC5600393; doi:10.1371/journal.pntd.0005882), 2017-09-05
Supplement: pntd.0005882.s009.pdf [file pntd.0005882.s009.pdf]

**S3 Table. Description of donors in the multi-disease study.**

|                | all | <i>T. cruzi</i> | HBV | HCV | WNV |
|----------------|-----|-----------------|-----|-----|-----|
| Group size (n) | 335 | 88              | 88  | 71  | 88  |
| Gender         |     |                 |     |     |     |
| female         | 62  | 27              | 7   | 7   | 21  |
| male           | 102 | 30              | 11  | 21  | 40  |
| unknown        | 171 | 31              | 70  | 43  | 27  |
| Ethnicity      |     |                 |     |     |     |
| white          | 70  | 5               | 2   | 16  | 47  |
| Hispanic       | 54  | 38              | 1   | 5   | 10  |
| black          | 5   | 0               | 4   | 1   | 0   |
| other          | 18  | 4               | 11  | 2   | 1   |
| unknown        | 188 | 41              | 70  | 47  | 30  |
| Age bin        |     |                 |     |     |     |
| (16-20)        | 11  | 3               | 3   | 1   | 4   |
| (20-30)        | 30  | 7               | 6   | 7   | 10  |
| (30-40)        | 26  | 14              | 2   | 2   | 8   |
| (40-50)        | 36  | 11              | 3   | 6   | 16  |
| (50-60)        | 35  | 12              | 1   | 10  | 12  |
| (60-70)        | 18  | 6               | 3   | 2   | 7   |
| (70-87)        | 8   | 4               | 0   | 0   | 4   |
| unknown        | 171 | 31              | 70  | 43  | 27  |
