# Supplementary material for: An ImmunoSignature test distinguishes Trypanosoma cruzi, hepatitis B, hepatitis C and West Nile virus seropositivity among asymptomatic blood donors
Source: PubMed Central journal article supplement (PMC5600393; doi:10.1371/journal.pntd.0005882), 2017-09-05
Supplement: pntd.0005882.s010.pdf [file pntd.0005882.s010.pdf]

**S4 Table. STARD 15 checklist for reporting of studies of diagnostic accuracy.**

| Section & Topic          | No         | Item                                                                                                                                                   | Reported on page #                    |
|--------------------------|------------|--------------------------------------------------------------------------------------------------------------------------------------------------------|---------------------------------------|
| <b>TITLE OR ABSTRACT</b> |            |                                                                                                                                                        |                                       |
|                          | <b>1</b>   | Identification as a study of diagnostic accuracy using at least one measure of accuracy (such as sensitivity, specificity, predictive values, or AUC)  | 1-2 (Abstract)                        |
| <b>ABSTRACT</b>          |            |                                                                                                                                                        |                                       |
|                          | <b>2</b>   | Structured summary of study design, methods, results, and conclusions (for specific guidance, see STARD for Abstracts)                                 | 1-2                                   |
| <b>INTRODUCTION</b>      |            |                                                                                                                                                        |                                       |
|                          | <b>3</b>   | Scientific and clinical background, including the intended use and clinical role of the index test                                                     | 2-4                                   |
|                          | <b>4</b>   | Study objectives and hypotheses                                                                                                                        | 1, 4                                  |
| <b>METHODS</b>           |            |                                                                                                                                                        |                                       |
| <i>Study design</i>      | <b>5</b>   | Whether data collection was planned before the index test and reference standard were performed (prospective study) or after (retrospective study)     | 4-5<br>Retrospective study            |
| <i>Participants</i>      | <b>6</b>   | Eligibility criteria                                                                                                                                   | 4-5, 10-11                            |
|                          | <b>7</b>   | On what basis potentially eligible participants were identified (such as symptoms, results from previous tests, inclusion in registry)                 | 4-5                                   |
|                          | <b>8</b>   | Where and when potentially eligible participants were identified (setting, location and dates)                                                         | 4-5                                   |
|                          | <b>9</b>   | Whether participants formed a consecutive, random or convenience series                                                                                | 4-5                                   |
| <i>Test methods</i>      | <b>10a</b> | Index test, in sufficient detail to allow replication                                                                                                  | 5-8                                   |
|                          | <b>10b</b> | Reference standard, in sufficient detail to allow replication                                                                                          | 4-5                                   |
|                          | <b>11</b>  | Rationale for choosing the reference standard (if alternatives exist)                                                                                  | 3                                     |
|                          | <b>12a</b> | Definition of and rationale for test positivity cut-offs or result categories of the index test, distinguishing pre-specified from exploratory         | 11-14                                 |
|                          | <b>12b</b> | Definition of and rationale for test positivity cut-offs or result categories of the reference standard, distinguishing pre-specified from exploratory | 11-13                                 |
|                          | <b>13a</b> | Whether clinical information and reference standard results were available to the performers/readers of the index test                                 | 8                                     |
|                          | <b>13b</b> | Whether clinical information and index test results were available to the assessors of the reference standard                                          | 8                                     |
| <i>Analysis</i>          | <b>14</b>  | Methods for estimating or comparing measures of diagnostic accuracy                                                                                    | 11-14                                 |
|                          | <b>15</b>  | How indeterminate index test or reference standard results were handled                                                                                | 13-14, no indeterminates              |
|                          | <b>16</b>  | How missing data on the index test and reference standard were handled                                                                                 | Not applicable                        |
|                          | <b>17</b>  | Any analyses of variability in diagnostic accuracy, distinguishing pre-specified from exploratory                                                      | 14                                    |
|                          | <b>18</b>  | Intended sample size and how it was determined                                                                                                         | 4-5, All available CTS Chagas samples |
| <b>RESULTS</b>           |            |                                                                                                                                                        |                                       |
| <i>Participants</i>      | <b>19</b>  | Flow of participants, using a diagram                                                                                                                  | S2 Figure                             |
|                          | <b>20</b>  | Baseline demographic and clinical characteristics of participants                                                                                      | S1 Table, S3 Table                    |
|                          | <b>21a</b> | Distribution of severity of disease in those with the target condition                                                                                 | Fig 2                                 |
|                          | <b>21b</b> | Distribution of alternative diagnoses in those without the target condition                                                                            | Not applicable                        |

|                          |           |                                                                                                             |                                        |
|--------------------------|-----------|-------------------------------------------------------------------------------------------------------------|----------------------------------------|
|                          | <b>22</b> | Time interval and any clinical interventions between index test and reference standard                      | Not applicable<br>Banked samples       |
| <i>Test results</i>      | <b>23</b> | Cross tabulation of the index test results (or their distribution) by the results of the reference standard | Table 1<br>Fig 3                       |
|                          | <b>24</b> | Estimates of diagnostic accuracy and their precision (such as 95% confidence intervals)                     | Fig 3, 13-14                           |
|                          | <b>25</b> | Any adverse events from performing the index test or the reference standard                                 | none                                   |
| <b>DISCUSSION</b>        |           |                                                                                                             |                                        |
|                          | <b>26</b> | Study limitations, including sources of potential bias, statistical uncertainty, and generalisability       | 21, 24                                 |
|                          | <b>27</b> | Implications for practice, including the intended use and clinical role of the index test                   | Proof of concept,<br>Feasibility study |
| <b>OTHER INFORMATION</b> |           |                                                                                                             |                                        |
|                          | <b>28</b> | Registration number and name of registry                                                                    | Not applicable                         |
|                          | <b>29</b> | Where the full study protocol can be accessed                                                               | 4-5, WIRB #<br>20152816                |
|                          | <b>30</b> | Sources of funding and other support; role of funders                                                       | In submission form                     |
